# Supplementary material for: The Vault Complex Is Significantly Involved in Therapeutic Responsiveness of Endocrine Tumors and Linked to Autophagy under Chemotherapeutic Conditions
Source: MDPI journal article supplement (doi:10.3390/cancers15061783), 2023-03-15
Supplement: s1 [file s1]

Supplementary Figure S1: MVP and Beta-actin Western Blots of control and TNF alpha treated BON and NCI-H295R cells. LC3B und Beta-actin Western Blots of BON and NCI-H295R control (BC, NC) or TNF alpha (BT, NT) treated cells. LC3B und Beta-actin Western Blots of control and EDPM treated NCI-H295R cells.

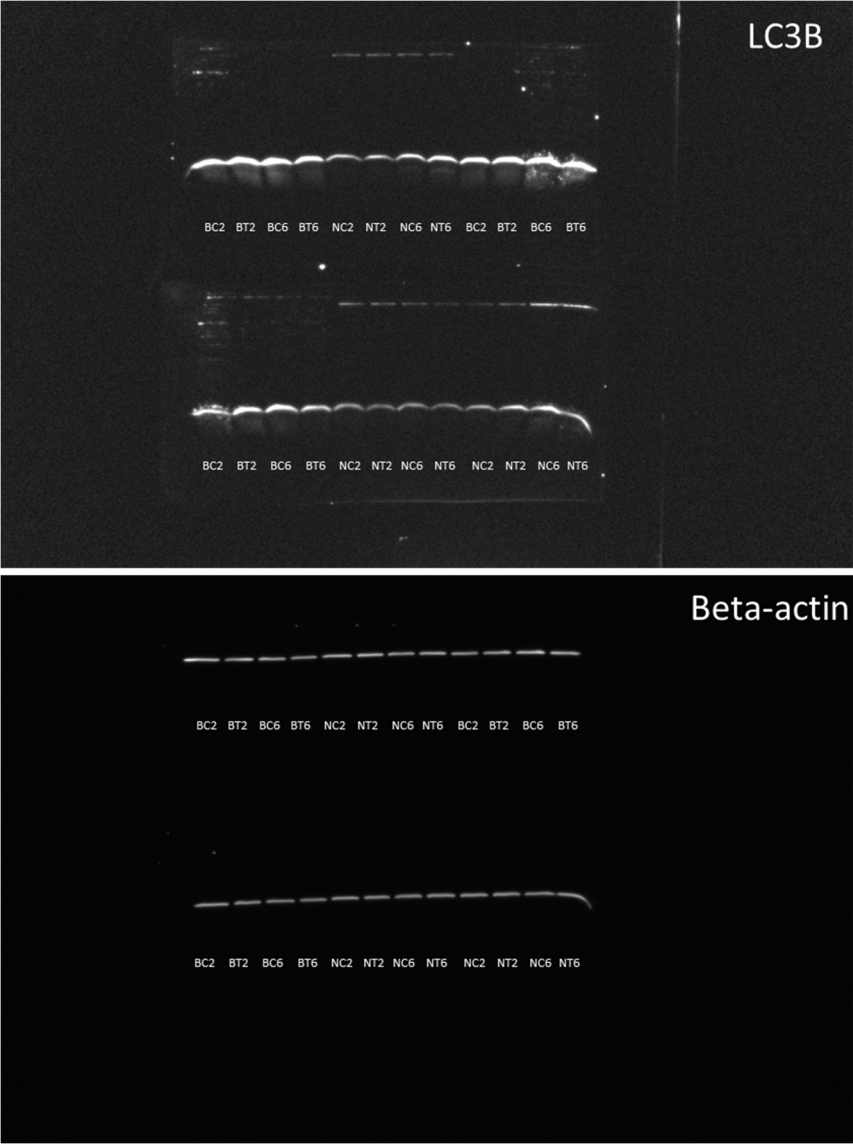

Supplementary Figure S2: Differential loading of vault RNA 1 under various si-RNA knockdown conditions for control and TNF alpha treated BON and NCI-H295R cells.

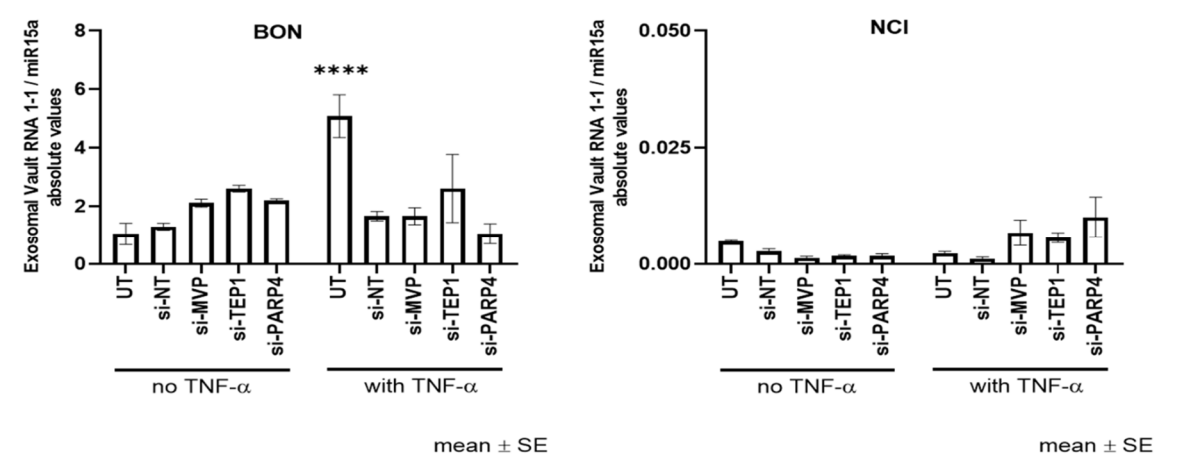

File S1: The whole western blots  
The Original WB of Figure 1

LC3B NCI,BON+TNFa

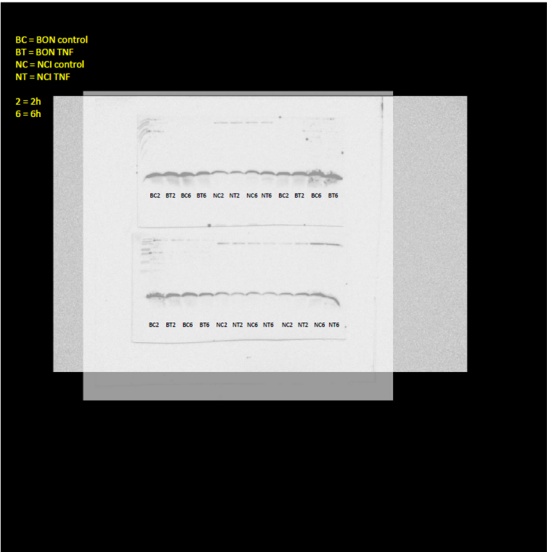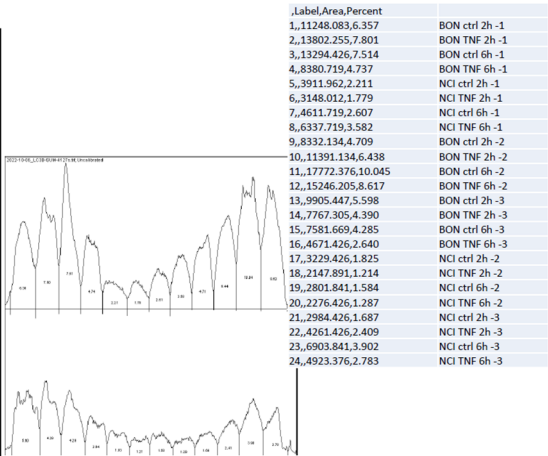

b-actin NCI,BON+TNFa

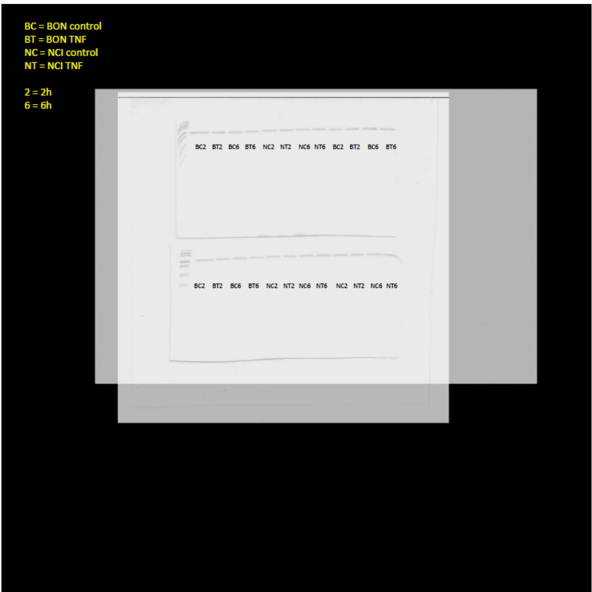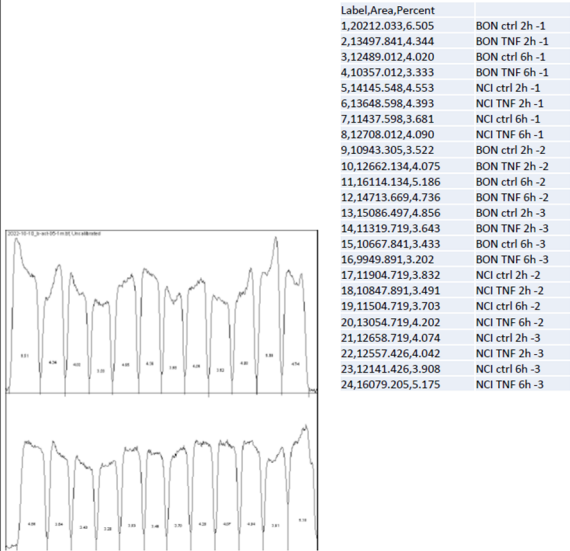

The Original WB of Figure 5 G

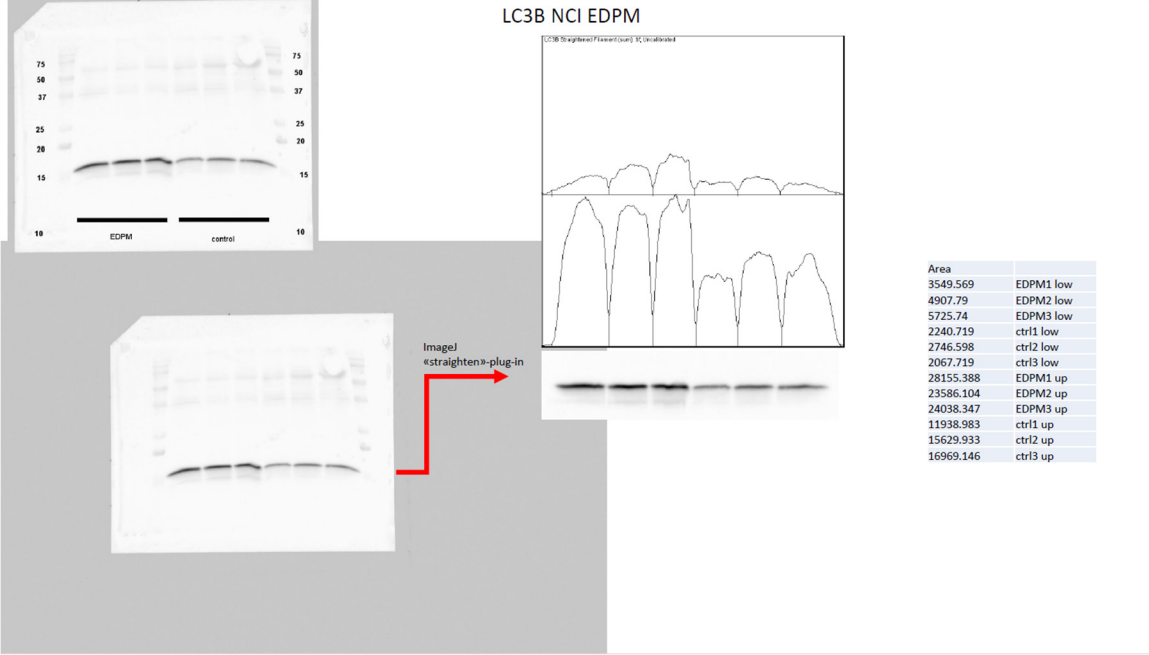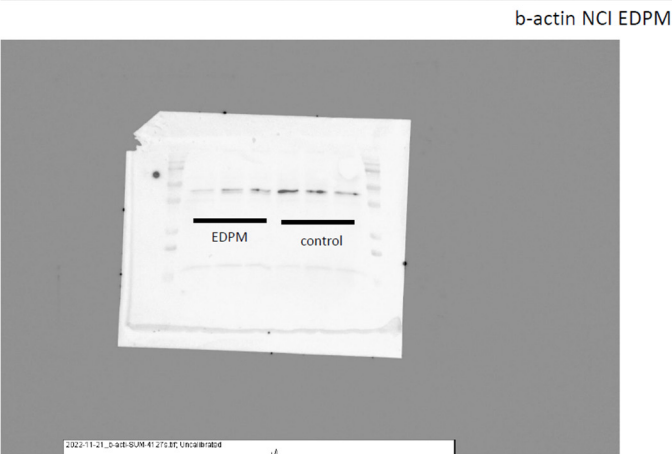

The Original WB of Figure 1 E

MVP NCI,BON +TNFa

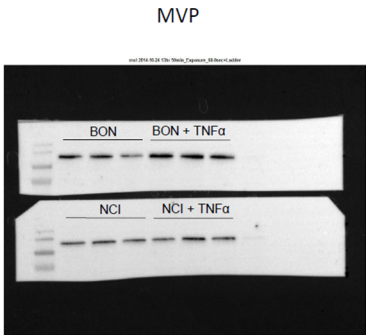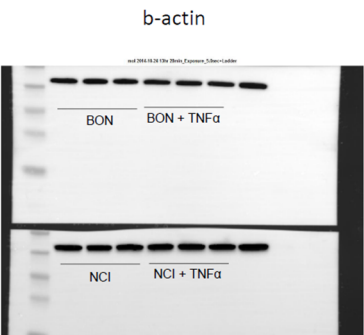

|       | MVP        | B actin    |       |
|-------|------------|------------|-------|
| Gel 1 | 9'608'317  | 16'465'903 | BON - |
|       | 9'196'146  | 16'492'660 | BON - |
|       | 5'170'246  | 15'679'075 | BON - |
|       | 14'517'409 | 16'184'317 | BON + |
|       | 13'546'288 | 16'387'903 | BON + |
|       | 12'040'459 | 15'743'782 | BON + |
|       | 291'435    | 20'054'853 | MCF-7 |
| Gel 2 | 7'916'075  | 19'865'924 | NCI - |
|       | 9'431'560  | 19'299'217 | NCI - |
|       | 7'962'024  | 22'282'945 | NCI - |
|       | 7'214'782  | 22'922'602 | NCI + |
|       | 12'180'752 | 23'848'430 | NCI + |
|       | 9'134'267  | 23'126'137 | NCI + |
|       | 315'192    | 26'844'480 | MCF-7 |
